# Supplementary material for: The New Normalcy in Dentistry after the COVID-19 Pandemic: An Italian Cross-Sectional Survey
Source: MDPI journal article supplement (doi:10.3390/dj9080086), 2021-07-31
Supplement: s1 [file s1]

**Table S1.** Questionnaire.

| Num. | Question                                                                                   | Answers                                                                                                                                                                                                                                                                              |
|------|--------------------------------------------------------------------------------------------|--------------------------------------------------------------------------------------------------------------------------------------------------------------------------------------------------------------------------------------------------------------------------------------|
| 1    | How many patients do you visit daily on average?                                           | <ul style="list-style-type: none"> <li>• <math>\leq 10</math> patients</li> <li>• 11 – 20 patients</li> <li>• <math>\geq 20</math> patients</li> </ul>                                                                                                                               |
| 2    | From the end of the Italian lockdown, have you restarted your regular activity?            | <ul style="list-style-type: none"> <li>• Yes</li> <li>• No</li> </ul>                                                                                                                                                                                                                |
| 3    | Do you replace the FFP2 mask after every 8 hours of use, even if not continuously?         | <ul style="list-style-type: none"> <li>• Yes</li> <li>• No</li> </ul>                                                                                                                                                                                                                |
| 4    | Do you simultaneously wear an FFP2 mask and surgical mask?                                 | <ul style="list-style-type: none"> <li>• Yes</li> <li>• No</li> </ul>                                                                                                                                                                                                                |
| 5    | Do you replace the FFP2 mask after each aerosol-generating procedure?                      | <ul style="list-style-type: none"> <li>• Yes</li> <li>• No</li> </ul>                                                                                                                                                                                                                |
| 6    | What PPE do you wear during aerosol-generating procedures?*                                | <ul style="list-style-type: none"> <li>• Head covering</li> <li>• Shoe covers</li> <li>• Double gloving</li> <li>• All PPE reported in this list</li> <li>• Others</li> </ul>                                                                                                        |
| 7    | Do you ventilate dental treatment rooms after each dental treatment?                       | <ul style="list-style-type: none"> <li>• Yes</li> <li>• No</li> <li>• Only after aerosol-generating procedures</li> </ul>                                                                                                                                                            |
| 8    | After each aerosol-generating procedure, do you sanitize air with special devices?         | <ul style="list-style-type: none"> <li>• Yes</li> <li>• No</li> </ul>                                                                                                                                                                                                                |
| 9    | Do you execute telephone triage for each patient?                                          | <ul style="list-style-type: none"> <li>• Yes</li> <li>• No</li> </ul>                                                                                                                                                                                                                |
| 10   | Do you ask patients to clean their hands before accessing the dental office?               | <ul style="list-style-type: none"> <li>• Yes</li> <li>• No</li> </ul>                                                                                                                                                                                                                |
| 11   | Do you measure patients' body temperature before accessing the dental office?              | <ul style="list-style-type: none"> <li>• Yes</li> <li>• No</li> </ul>                                                                                                                                                                                                                |
| 12   | Do you ask patients to complete the prescreening Covid-19 questionnaire?                   | <ul style="list-style-type: none"> <li>• Yes</li> <li>• No</li> </ul>                                                                                                                                                                                                                |
| 13   | Do you ask patients to clean their hands again before accessing the dental treatment room? | <ul style="list-style-type: none"> <li>• Yes</li> <li>• No</li> </ul>                                                                                                                                                                                                                |
| 14   | What is, on average, the time of permanence in the waiting room for each patient?          | <ul style="list-style-type: none"> <li>• Less than 5 minutes</li> <li>• 5-10 minutes</li> <li>• 10-15 minutes</li> <li>• Over 15 minutes</li> </ul>                                                                                                                                  |
| 15   | Before dental treatment, do you ask the patient to rinse their mouth?                      | <ul style="list-style-type: none"> <li>• Yes</li> <li>• No</li> </ul>                                                                                                                                                                                                                |
| 16   | What kind of rinses do you do before dental treatments?                                    | <ul style="list-style-type: none"> <li>• Chlorhexidine (CHX)</li> <li>• Cetylpyridine(CPC) with 0.12% CHX</li> <li>• Esetidine</li> <li>• Hydrogen peroxide (H<sub>2</sub>O<sub>2</sub>)</li> <li>• H<sub>2</sub>O<sub>2</sub> followed by Chlorhexidine</li> <li>• Other</li> </ul> |
| 17   | Have you been infected with the SARS-CoV-2 virus?                                          | <ul style="list-style-type: none"> <li>• Yes</li> <li>• No</li> </ul>                                                                                                                                                                                                                |
| 18   | Have any of your family members been infected?                                             | <ul style="list-style-type: none"> <li>• Yes</li> <li>• No</li> </ul>                                                                                                                                                                                                                |
| 19   | Has any of your staff been infected?                                                       | <ul style="list-style-type: none"> <li>• Yes</li> </ul>                                                                                                                                                                                                                              |

|    |                                                                                                                                               |   |                                                                                                                                  |
|----|-----------------------------------------------------------------------------------------------------------------------------------------------|---|----------------------------------------------------------------------------------------------------------------------------------|
|    |                                                                                                                                               | • | No                                                                                                                               |
| 20 | Have you treated Covid-19 positive or suspected patients?                                                                                     | • | Yes                                                                                                                              |
|    |                                                                                                                                               | • | No                                                                                                                               |
| 21 | Did you adopt other PPEs, sanitization, or ventilation methods treating Covid-19 positive/suspected patients?                                 | • | Yes                                                                                                                              |
|    |                                                                                                                                               | • | No                                                                                                                               |
| 22 | Do you have employees?                                                                                                                        | • | Yes                                                                                                                              |
|    |                                                                                                                                               | • | No                                                                                                                               |
| 23 | Did you ask your employees to perform a serological test after the end of the lockdown?                                                       | • | Yes                                                                                                                              |
|    |                                                                                                                                               | • | No                                                                                                                               |
| 24 | Did you treat patients who resulted Covid-19 positive after one/two days after dental treatment?                                              | • | Yes                                                                                                                              |
|    |                                                                                                                                               | • | No                                                                                                                               |
| 25 | After the patient's positive communication, did you contact the competent doctor to decide if and what precautions to take?                   | • | Yes                                                                                                                              |
|    |                                                                                                                                               | • | No                                                                                                                               |
| 26 | What precautions did you or the competent doctor adopt?                                                                                       | • | Only rapid test                                                                                                                  |
|    |                                                                                                                                               | • | Only fiduciary isolation for staff who came in contact with the infected patient                                                 |
|    |                                                                                                                                               | • | Rapid test and fiduciary isolation                                                                                               |
|    |                                                                                                                                               | • | No precautions because the infection could not have occurred due to procedures and precautions taken during the dental treatment |
|    |                                                                                                                                               | • | Other                                                                                                                            |
| 27 | I am worried that I may contract the virus during my work                                                                                     | • | 1 = Strongly disagree                                                                                                            |
|    |                                                                                                                                               | • | 2 = Disagree                                                                                                                     |
|    |                                                                                                                                               | • | 3 = Neither agree or disagree                                                                                                    |
|    |                                                                                                                                               | • | 4 = Agree                                                                                                                        |
|    |                                                                                                                                               | • | 5 = Strongly agree                                                                                                               |
| 28 | Given the current pandemic situation, I would like to suspend my business                                                                     | • | 1 = Strongly disagree                                                                                                            |
|    |                                                                                                                                               | • | 2 = Disagree                                                                                                                     |
|    |                                                                                                                                               | • | 3 = Neither agree nor disagree                                                                                                   |
|    |                                                                                                                                               | • | 4 = Agree                                                                                                                        |
|    |                                                                                                                                               | • | 5 = Strongly agree                                                                                                               |
| 29 | I am worried about being in quarantine or fiduciary isolation                                                                                 | • | 1 = Strongly disagree                                                                                                            |
|    |                                                                                                                                               | • | 2 = Disagree                                                                                                                     |
|    |                                                                                                                                               | • | 3 = Neither agree nor disagree                                                                                                   |
|    |                                                                                                                                               | • | 4 = Agree                                                                                                                        |
|    |                                                                                                                                               | • | 5 = Strongly agree                                                                                                               |
| 30 | I believe that in 2021 I will continue to have economic losses                                                                                | • | 1 = Strongly disagree                                                                                                            |
|    |                                                                                                                                               | • | 2 = Disagree                                                                                                                     |
|    |                                                                                                                                               | • | 3 = Neither agree nor disagree                                                                                                   |
|    |                                                                                                                                               | • | 4 = Agree                                                                                                                        |
|    |                                                                                                                                               | • | 5 = Strongly agree                                                                                                               |
| 31 | I am confident in current contagion prevention procedures                                                                                     | • | 1 = Strongly disagree                                                                                                            |
|    |                                                                                                                                               | • | 2 = Disagree                                                                                                                     |
|    |                                                                                                                                               | • | 3 = Neither agree nor disagree                                                                                                   |
|    |                                                                                                                                               | • | 4 = Agree                                                                                                                        |
|    |                                                                                                                                               | • | 5 = Strongly agree                                                                                                               |
| 32 | Do you think that we will return to normalcy as that before the Covid-19 outbreak?                                                            | • | Yes                                                                                                                              |
|    |                                                                                                                                               | • | No                                                                                                                               |
| 33 | When the Covid-19 pandemic is over or under control, will you adopt some or all of the preventive behaviors you learned during this pandemic? | • | Yes                                                                                                                              |
|    |                                                                                                                                               | • | No                                                                                                                               |

|    |                                                                             |                                                                                                                                                                                                                                                                                                                                                                                                                                   |
|----|-----------------------------------------------------------------------------|-----------------------------------------------------------------------------------------------------------------------------------------------------------------------------------------------------------------------------------------------------------------------------------------------------------------------------------------------------------------------------------------------------------------------------------|
| 34 | What behaviors you learned during the pandemic will you continue to adopt?* | <ul style="list-style-type: none"> <li>• Patients hand disinfection</li> <li>• FFP2 mask (even just for aerosol-generating procedures)</li> <li>• Covid-19 questionnaire</li> <li>• Air sanitization with specific devices</li> <li>• Preliminary rinses with hydrogen peroxide</li> <li>• Disposable overcoat</li> <li>• Thermo scanner</li> <li>• Telephone triage</li> <li>• Air ventilation</li> <li>• Face shield</li> </ul> |
| 35 | What does it mean for you to go back to normal?                             | <ul style="list-style-type: none"> <li>• Greater relaxation during the entire daily activity</li> <li>• Reduction in the level of anxiety/fear of being infected</li> <li>• Restoration of patient flow as in the pre-Covid period</li> <li>• Use of noninvasive sanitation procedures</li> </ul>                                                                                                                                 |
| 36 | Gender                                                                      | <ul style="list-style-type: none"> <li>• Female</li> <li>• Male</li> </ul>                                                                                                                                                                                                                                                                                                                                                        |
| 37 | Age                                                                         | <ul style="list-style-type: none"> <li>• Less than 30 years</li> <li>• 30 – 45</li> <li>• 46 – 60</li> <li>• Over 60 years</li> </ul>                                                                                                                                                                                                                                                                                             |
| 38 | Region                                                                      | Free-text                                                                                                                                                                                                                                                                                                                                                                                                                         |

\* Multiple-choice response

**Table S2.** Number of dentists by geographic areas.

| <b>Number of dentists by geographic areas.</b> |               |
|------------------------------------------------|---------------|
| <b>Total Number</b>                            | <b>58,579</b> |
| <b>Geographic Area, n(%)</b>                   |               |
| North-West                                     | 16,634        |
| North-East                                     | 11,196        |
| Center                                         | 13,151        |
| South                                          | 12,076        |
| Islands (Sicily and Sardinia)                  | 5,522         |

\* Source Information: Putrino et al. (2020)
